# Supplementary material for: PPARγ Antagonists Exhibit Antitumor Effects by Regulating Ferroptosis and Disulfidptosis
Source: MDPI journal article supplement (doi:10.3390/biom14050596), 2024-05-18
Supplement: s1 [file s1]

# **PPAR $\gamma$ antagonists exhibit antitumor effects by regulating ferroptosis and disulfidptosis**

Shiyu Zhang<sup>1 †</sup>, Ying Wang<sup>1 †</sup>, Junjie Gu<sup>1</sup>, Yang Yang<sup>1</sup>, Jing Liang<sup>1</sup>, Yimei Wang<sup>1</sup>, Ning Ji<sup>1</sup>,  
Ming Liu<sup>1</sup>, Yingxin Zhang<sup>1</sup>, Silu Sun<sup>1</sup>, Qianming Chen<sup>1</sup>, Jing Li<sup>1\*</sup>

<sup>1</sup>State Key Laboratory of Oral Diseases, National Clinical Research Center for Oral Diseases, Research Unit of Oral Carcinogenesis and Management, Chinese Academy of Medical Sciences, West China Hospital of Stomatology, Sichuan University, Chengdu, China

<sup>✉</sup>e-mail: lijing1984@scu.edu.cn (J.L.)

**This file includes:**

- **Figure S1, S2, S3**
- **Table S1**

## Supplemental Figures and Figure Legends

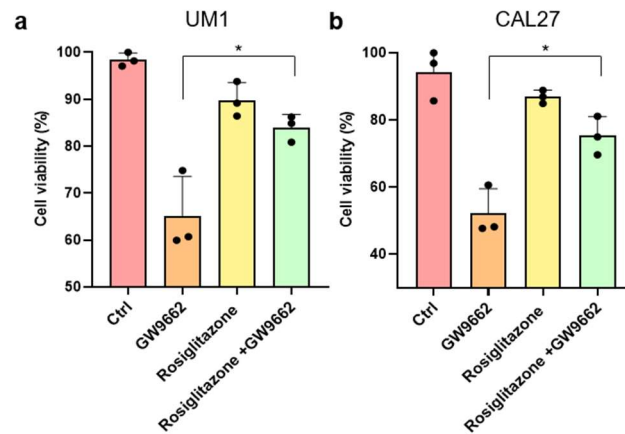

### Supplemental Fig S1. Rosiglitazone rescues cell death induced by GW9662. a-b.

CCK-8 assay demonstrates that the PPAR $\gamma$  agonist (rosiglitazone, 10  $\mu$ M) significantly rescues OSCC cell death induced by the PPAR $\gamma$  receptor antagonist (GW9662, 20  $\mu$ M). Data represent mean values  $\pm$  SD from three independent experiments. The asterisks indicate significant differences (Student's t tests, \*P < 0.05, \*\*P < 0.01, \*\*\*P < 0.001).

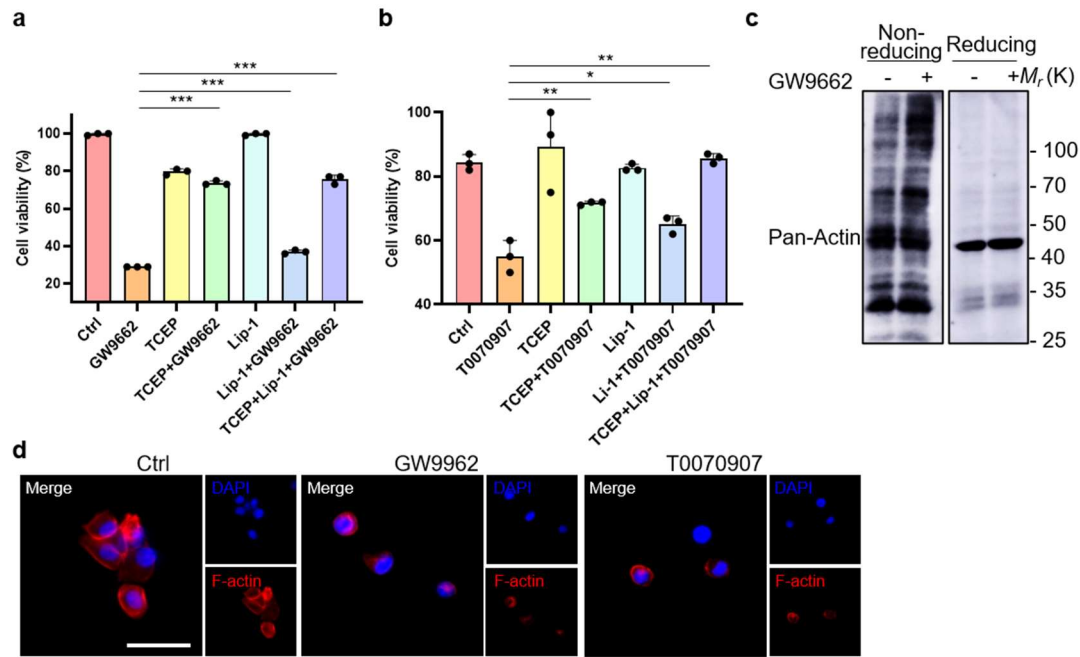

**Supplemental Fig S2. Effects of inhibiting PPAR $\gamma$  on ferroptosis and disulfidptosis in CAL27.** **a-b.** CCK-8 assay demonstrated the synergistic effect of ferroptosis inhibitor (Liproxstatin-1, 2  $\mu$ M) and disulfidptosis inhibitor (TCEP, 1 mM) in rescuing CAL27 cell death induced by PPAR $\gamma$  receptor antagonists (GW9662, T0070907, 20  $\mu$ M). **c.** Non-reducing and reducing western blot analysis of indicated actin in CAL27 cells treated with or without GW9662(20  $\mu$ M) for 24 hours. **d.** Fluorescence staining of F-actin and DAPI in CAL27 cells cultured in GW9662 (20  $\mu$ M) for 24 hours (Scale bar: 1  $\mu$ m). Lip-1 represents Liproxstatin-1. Data represent mean values  $\pm$  SD from three independent experiments. The asterisks indicate significant differences (Student's t tests, \*P < 0.05, \*\*P < 0.01, \*\*\*P < 0.001).

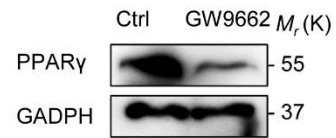

**Supplemental Fig S3. The alterations in the protein levels of PPAR $\gamma$  in mouse OSCC.** Western blot detected the protein expression levels of PPAR $\gamma$  in mouse OSCC tumors treated with GW9662.

**Table S1: Antibodies used for CyTOF staining**

| List | Label | Marker                 | Clone       |
|------|-------|------------------------|-------------|
| 1    | 89Y   | CD45                   | 30-F11      |
| 2    | 115In | CD3 $\epsilon$         | 145-2C11    |
| 3    | 139La | Ki-67                  | SolA15      |
| 4    | 141Pr | CD95(Fas)              | SA367H8     |
| 5    | 142Nd | CD11c                  | N418        |
| 6    | 143Nd | CD366(Tim-3)           | RMT3-23     |
| 7    | 144Nd | CX3CR1                 | SA011F11    |
| 8    | 145Nd | T-bet                  | 4B10        |
| 9    | 146Nd | CD27                   | LG.3A10     |
| 10   | 147Sm | CD161(NK-1.1)          | PK136       |
| 11   | 148Nd | Ly-6C                  | HK1.4       |
| 12   | 149Sm | CD172a(SIRP $\alpha$ ) | P84         |
| 13   | 150Nd | CD25                   | 3C7         |
| 14   | 151Eu | CD44                   | IM7         |
| 15   | 152Sm | CD19                   | 6D5         |
| 16   | 153Eu | CD274(PD-L1)           | 10F.9G2     |
| 17   | 154Sm | CD194(CCR4)            | 2G12        |
| 18   | 155Gd | CD223(LAG-3)           | C9B7 W      |
| 19   | 156Gd | FOXP3                  | FJK-16s     |
| 20   | 157Gd | CD39                   | 5F2         |
| 21   | 158Gd | VISTA(PD-1H)           | MIH63       |
| 22   | 159Tb | F4/80                  | Cl:A3-1     |
| 23   | 160Gd | CD62L                  | MEL-14      |
| 24   | 161Dy | TIGIT(VSTM3)           | 2190A       |
| 25   | 162Dy | CD206(MMR)             | C068C2      |
| 26   | 163Dy | Ly-6G                  | 1A8         |
| 27   | 164Dy | CD103                  | 2E7         |
| 28   | 165Ho | CD278(ICOS)            | C398.4A     |
| 29   | 166Er | CD192(CCR2)            | 475301      |
| 30   | 167Er | CD184(CXCR4)           | L276F12     |
| 31   | 168Er | CD49b(pan-NK cells)    | DX5         |
| 32   | 169Tm | CD127(IL-7R $\alpha$ ) | A7R34       |
| 33   | 170Er | iNOS                   | CXNFT       |
| 34   | 171Yb | CD69                   | H1.2F3      |
| 35   | 172Yb | CD279(PD-1)            | 29F.1A12    |
| 36   | 173Yb | Granzyme B Recombinant | QA16A02     |
| 37   | 174Yb | CD196(CCR6)            | 29-2L17     |
| 38   | 175Lu | TCR $\beta$ chain      | H57-597     |
| 39   | 176Yb | MHC II(I-A/I-E)        | M5/114.15.2 |
| 40   | 197Au | CD4                    | RM4-5       |

|    |       |       |        |
|----|-------|-------|--------|
| 41 | 198Pt | CD8a  | 53-6.7 |
| 42 | 209Bi | CD11b | M1/70  |

---
